# Supplementary material for: High performance heterojunction photocatalytic membranes formed by embedding Cu2O and TiO2nanowires in reduced graphene oxide
Source: Royal Society of Chemistry journal article supplement (doi:10.1039/c8cy00082d), 2018-01-01
Supplement: c8cy00082d1.pdf [file c8cy00082d1.pdf]

## High Performance Heterojunction Photocatalytic Membranes Formed by Embedment of Cu<sub>2</sub>O and TiO<sub>2</sub> Nanowires in Reduced Graphene Oxide

Wentai Wang<sup>a,†</sup>, Zhiqing Wu<sup>b,†</sup>, Ehsan Eftekhari<sup>b</sup>, Ziyang Huo<sup>b</sup>, Xiaoming Li<sup>b,c</sup>, Moses O. Tade<sup>d</sup>, Cheng Yan<sup>e</sup>, Zifeng Yan<sup>f\*</sup>, Chunhu Li<sup>a\*</sup>, Qin Li<sup>b\*</sup> and Dongyuan Zhao<sup>c</sup>

<sup>a</sup> Key Laboratory of Marine Chemistry Theory and Technology, Ministry of Education, College of Chemistry and Chemical Engineering, Ocean University of China, Qingdao, China;

<sup>b</sup> Queensland Micro- and Nanotechnology Centre, School of Engineering, Griffith University Nathan Campus, Brisbane, Australia;

<sup>c</sup> Department of Chemistry, Fudan University, Shanghai, 200433, P.R. China;

<sup>d</sup> Department of Chemical Engineering, Curtin University, Perth, WA 6845, Australia;

<sup>e</sup> School of Chemistry, Physics and Mechanical Engineering, Queensland University of Technology, QLD 4000, Australia;

<sup>f</sup> State Key Laboratory of Heavy Oil Processing Key Laboratory of CNPC, China University of Petroleum, Qingdao, China.

† The authors have made equal contributions.

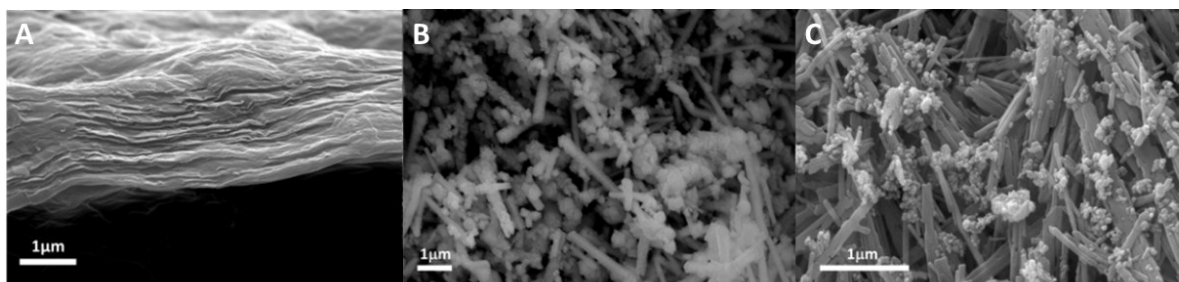

**Fig. S1** FESEM images of (a) rGO membrane. (b) Cu<sub>2</sub>O nanowires. (c) TiO<sub>2</sub> nanowires.

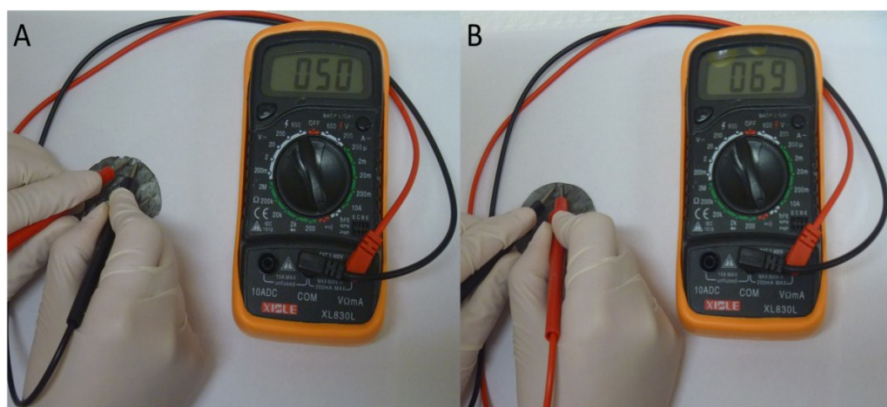

**Fig. S2** The resistance of the rGO membrane (a) and rGO/Cu<sub>2</sub>O/TiO<sub>2</sub> membrane (b).

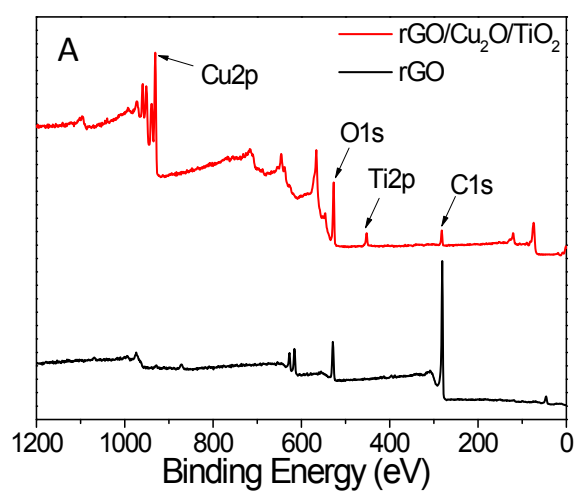

**Fig S3.** XPS survey spectrum of the rGO/Cu<sub>2</sub>O/TiO<sub>2</sub> composite membranes.

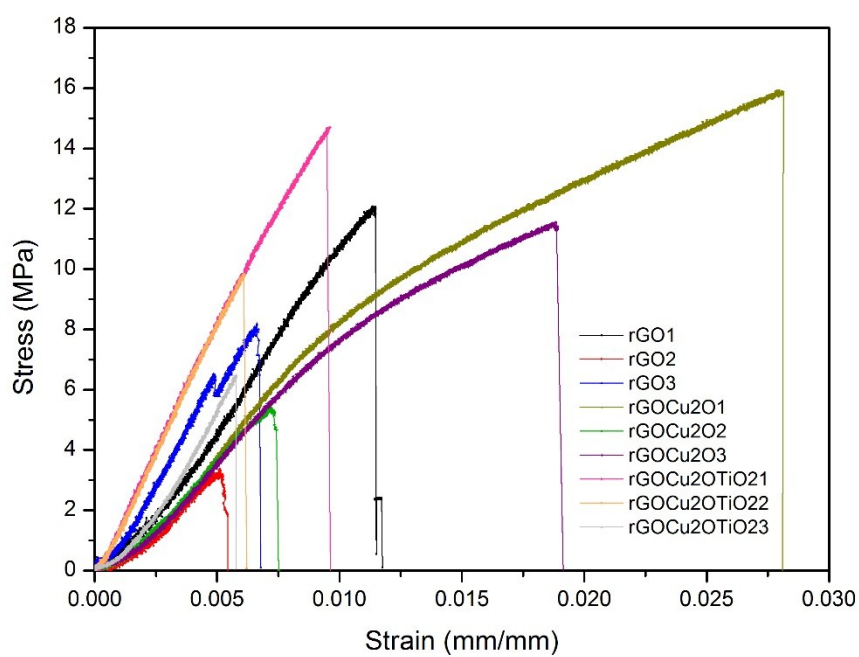

Fig S4. Tensile stress-strain tests.

Table S1. Tensile Young's Moduli of unary, binary and ternary rGO membranes.

| Sample                                   | Young's Modulus (E) |
|------------------------------------------|---------------------|
| rGO 1                                    | 1117.67104          |
| rGO 2                                    | 919.95378           |
| rGO 3                                    | 1360.14432          |
| rGO/Cu <sub>2</sub> O 1                  | 364.85664           |
| rGO/Cu <sub>2</sub> O 2                  | 850.97092           |
| rGO/Cu <sub>2</sub> O 3                  | 394.24711           |
| rGO/Cu <sub>2</sub> O/TiO <sub>2</sub> 1 | 1360.96589          |
| rGO/Cu <sub>2</sub> O/TiO <sub>2</sub> 2 | 1522.31699          |
| rGO/Cu <sub>2</sub> O/TiO <sub>2</sub> 3 | 1508.80656          |

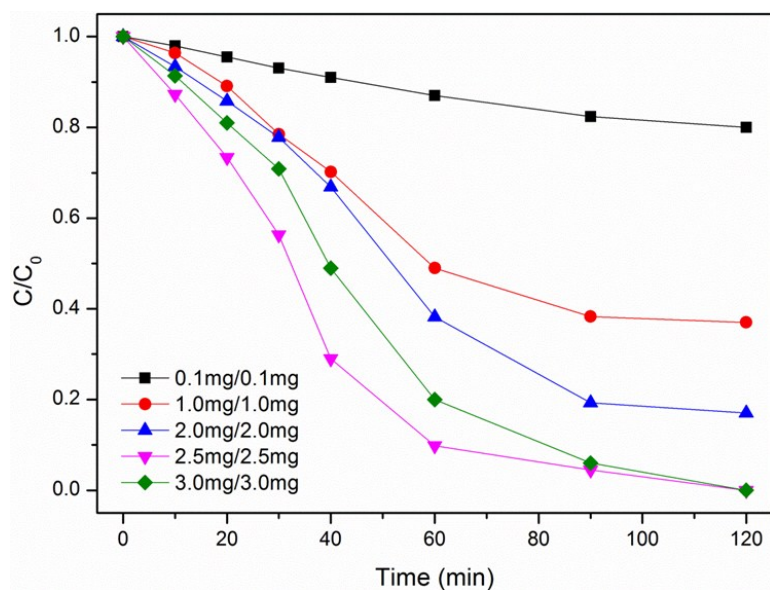

**Fig. S5** The photocatalytic degradation of Methyl Orange by rGO/Cu<sub>2</sub>O/TiO<sub>2</sub> composite membrane with different Cu<sub>2</sub>O NWs/TiO<sub>2</sub> NWs loadings under UV-Vis light irradiation;

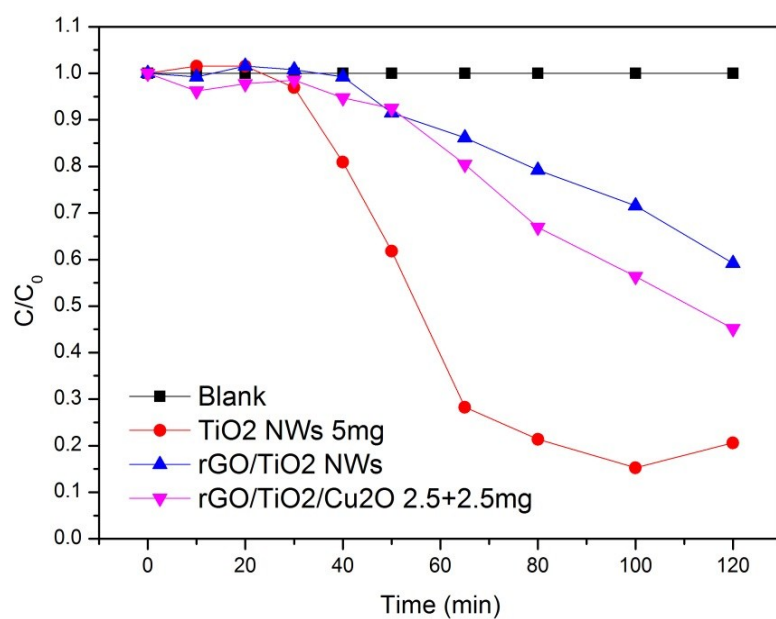

**Fig. S6** The photocatalytic degradation of Benzoic Acid by rGO/Cu<sub>2</sub>O/TiO<sub>2</sub> membrane under UV-Vis light irradiation;

### **Experimental details for the photocatalytic pathway study**

The selection of Rhodamine B (RhB) as the model molecule in this study is due to its distinguishable UV-vis absorption peak relative to isopropanol and methanol. 40ml 10 ppm RhB solution was prepared and one piece of rGO/TiO<sub>2</sub>/Cu<sub>2</sub>O membrane was added into the solution, stirring at 300rpm in absence of light. Once the system has reached the adsorption-desorption equilibrium after 1 hour, the system started to expose to UV-Vis illumination. 0.1M isopropanol was added in order to quench •OH, 1 mL of RhB was sampled at certain time intervals and absorbance was measured by UV-Vis spectrometer to monitor the quenching effect. Same procedure was repeated however instead of using isopropanol, 0.1M methanol was employed to scavenge both h<sup>+</sup> and •OH.
